# Supplementary material for: Fast-lysis cell traps for chemical cytometry
Source: Royal Society of Chemistry journal article supplement (doi:10.1039/b719301g), 2008-01-01

## Supplementary Information

The supplementary information section gives a more in depth explanation of various experimental parameters. The sections are:

1. Loading cells with fluorescent compounds
2. **Fig. S1.** Comparison of the two different cell trap-electrode designs.
3. **Fig. S2.** Delamination of SU-8 on glass upon exposure to aqueous solutions.

**Loading cells with fluorescent compounds.** Cells were incubated in ECB buffer with fluorescein diacetate (3.3  $\mu\text{M}$ ) and Oregon Green carboxylic acid diacetate (6.6  $\mu\text{M}$ ) for 30 min at room temperature. The ECB solution was then replaced with DMEM culture medium and the cells placed in an incubator (37°C, 5%  $\text{CO}_2$ ) for 15 min. The cells were washed and immediately used for analyses.

**Fig. S1.** Comparison of the two different cell trap-electrode designs. A) Depiction of the two-electrode design. The electrodes were composed of gold overlying titanium. B) Images of the two-electrode design. The left image shows the upper and lower electrode addressing the cell trap. The right image is a close-up of the cell trap with the two underlying electrodes. C) Images of the single-electrode design. The left image shows the parallel lines of electrodes which are nearly transparent since they consist of a thin layer of indium tin oxide. The right image is of a single cell trap overlying an electrode.

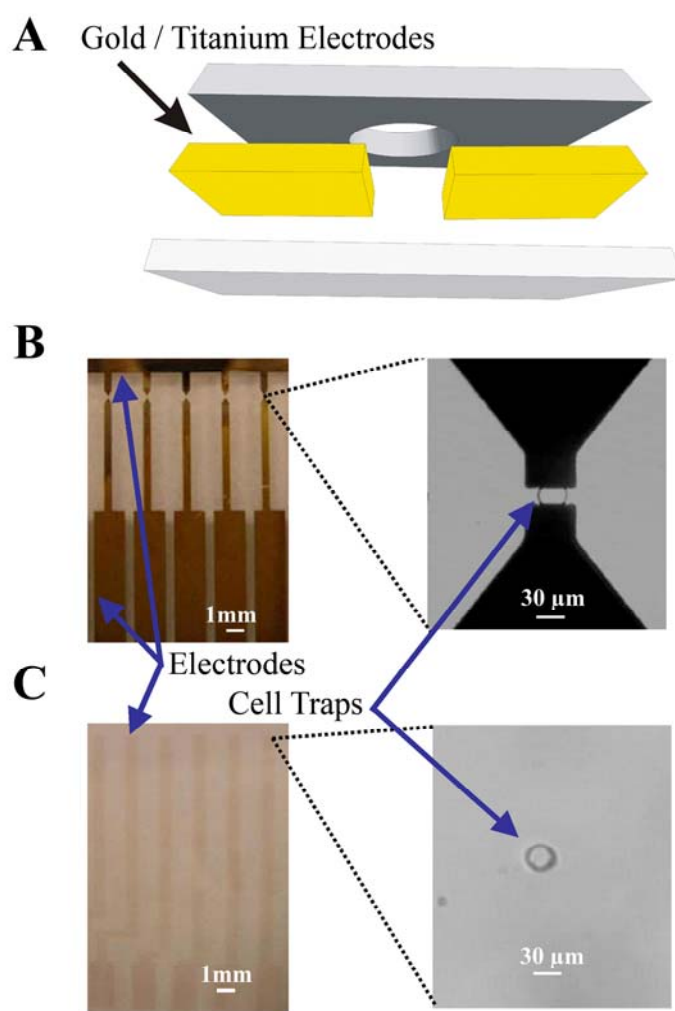

**Fig. S2.** Delamination of SU-8 on glass upon exposure to aqueous solutions. A, B)  
Images of SU-8 delamination after incubation in an aqueous buffer for 2 hours.

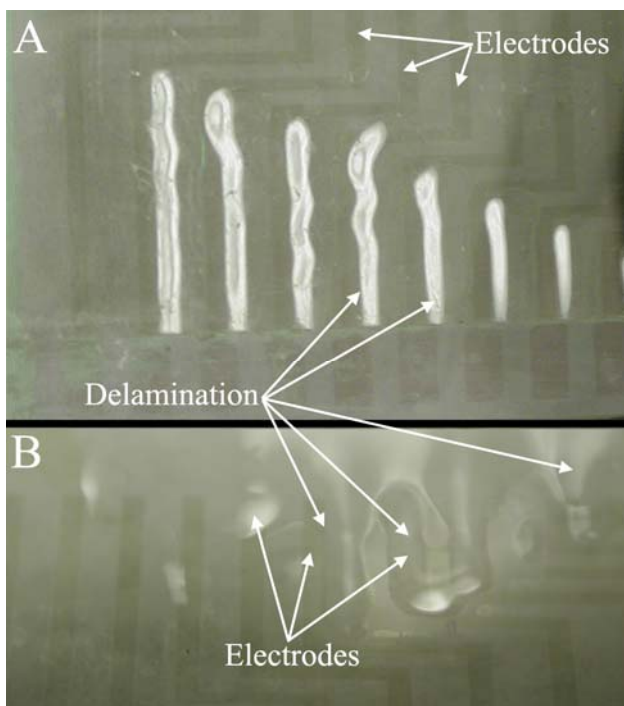

Supplement: b719301g.pdf [file b719301g.pdf]
